# Supplementary material for: Liquid Chromatographic Enantioseparation of Newly Synthesized Fluorinated Tryptophan Analogs Applying Macrocyclic Glycopeptides-Based Chiral Stationary Phases Utilizing Core-Shell Particles
Source: MDPI journal article supplement (doi:10.3390/ijms25094719), 2024-04-26
Supplement: s1 [file s1]

## Supporting Information for

### Liquid Chromatographic Enantioseparation of Newly Synthesized Fluorinated Tryptophan Analogs Applying Macrocyclic Glycopeptides-Based Chiral Stationary Phases Utilizing Core-Shell Particles

Dániel Tanács<sup>1</sup>, Róbert Berkecz<sup>1</sup>, Zsolt Bozsó<sup>2</sup>, Gábor K. Tóth<sup>2</sup>, Daniel W. Armstrong<sup>3</sup>, Antal Péter<sup>1</sup> and István Ilisz<sup>1,\*</sup>

<sup>1</sup> Institute of Pharmaceutical Analysis, University of Szeged, H-6720 Szeged, Hungary

<sup>2</sup> Department of Medical Chemistry, University of Szeged, H-6720 Szeged, Hungary

<sup>3</sup> Department of Chemistry and Biochemistry, University of Texas at Arlington, Arlington, TX 76019-0065, USA

**Corresponding author:** István Ilisz

Institute of Pharmaceutical Analysis, University of Szeged, Somogyi B. u. 4, H-6720 Szeged, Hungary

E-mail: ilisz.istvan@szte.hu

#### **Description of the preparation of enantiopure di- and tetra-fluorinated tryptophans**

Our reaction conditions were merged from those found in the literature [1-4]. 0.25 mmol L-serine and 4 mg of pyridoxal-5'-phosphate hydrate (Biosynth Carbosynth, Staad, Switzerland) were dissolved in 10 mL KH<sub>2</sub>PO<sub>4</sub>/K<sub>2</sub>HPO<sub>4</sub> buffer (0.1 M, pH=8). 0.2 mmol fluorinated indole was dissolved in 200 µl of methanol (Lichrosolv®, Supelco®, Merck Budapest, Hungary) and added to the above-mentioned solution dropwise, while it was vigorously stirred. Finally, 2 mg of apotryptophanase enzyme (75-150 units/mg, Sigma-Aldrich, St. Louis, MO, USA) was added to the mixture. The temperature was kept at 40 °C. The reaction was monitored by LC-MS and when the HPLC trace indicated it was halted (1-4 weeks, depending on the substrate) and purified by preparative RP-HPLC. The LC-MS system consisted of an Agilent (Santa Clara, CA, USA) 1200 HPLC and a Waters ACQUITY SQ detector (Milford, MA, USA). Eluent A and B were 0.1% TFA in water and 0.1% TFA in water (20%) and acetonitrile (80%) (Merck KGaA, Darmstadt, Germany), respectively. The HPLC trace was monitored at 278 and 210 nm. For analytical measurements, a Phenomenex Luna C18 column (10µm, 100Å, 250×4.6 mm i.d.) with a gradient elution and a flow rate of 1.0 ml min<sup>-1</sup> was used. Purification was done on a Shimadzu (Kyoto, Japan) 20AD HPLC system on Phenomenex Luna C18 (10µm, 100Å, 250×21.2 mm i.d.) column applying a flow rate of 5.0 ml min<sup>-1</sup> and detection wavelength of 210 nm. The pure fractions were pooled and lyophilized.

[1] D.R.M. Smith, T. Willemse, D.S.Gkotsi, W. Stephens, B.U.W. Maes, S. Ballet, R.J.M. Goss, *Org. Lett.* 16 (2014) 2622-2625.

[2] A. Shimada, H. Ozaki, T. Saito, N. Fujii, *J. Chromatogr. B.*, 879 (2011) 3289-3295.

[3] J. Du, J.J. Duan, Q. Zhang, J. Hou, F. Bai, N. Chen, G. Bai, *Appl. Biochem. Microbiol.* 48 (2012) 159-166.

[4] J.M. Corr, R.M.D. Smith, R.J.M. Goss, *Tetrahedron*, 72 (2016) 7306-7310.

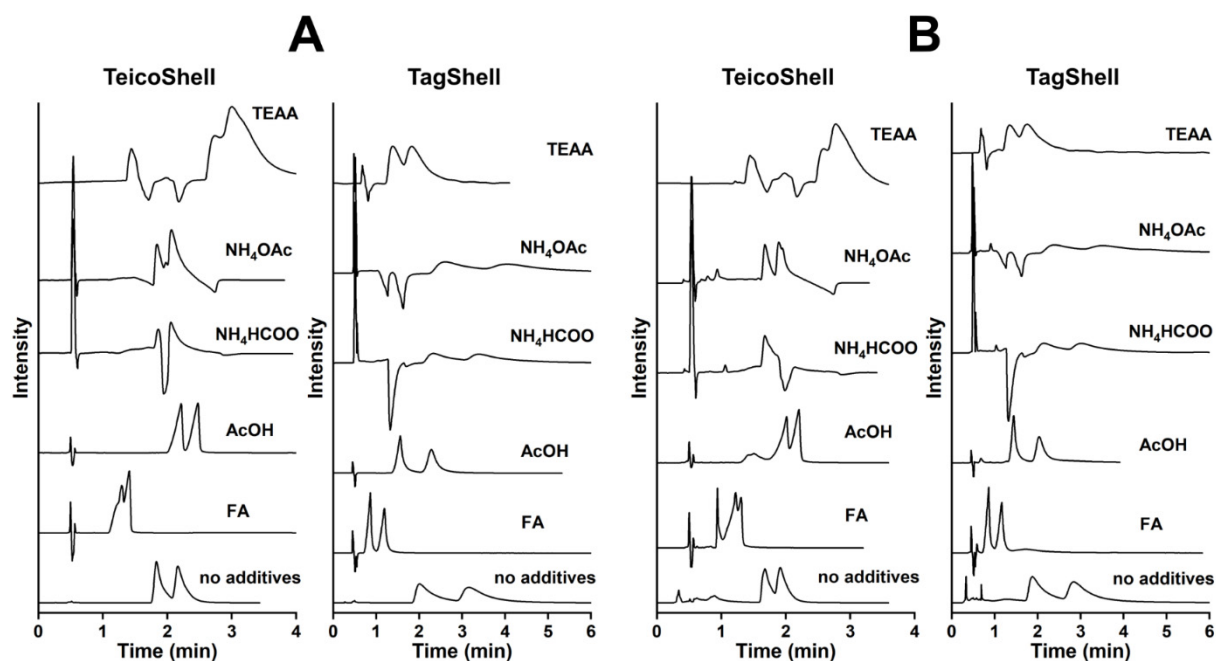

**Figure S1**

**Effects of acid and salt additives on the chiral separations of 5-FTrp (A) and 5,6-diFTrp (B)**

Chromatographic conditions: columns, TeicoShell and TagShell; mobile phase H<sub>2</sub>O/MeOH = 85/15 (v/v) containing NH<sub>4</sub>OAc, NH<sub>4</sub>HCOO, AcOH, FA, and H<sub>2</sub>O/MeOH = 70/30 (v/v) containing TEAA; the concentration of NH<sub>4</sub>OAc and AcOH were 17.5 mM, while the concentration of NH<sub>4</sub>HCOO and FA were 26.5 mM (all corresponding to 0.1 v% AcOH concentration); detection, 215 nm; flow rate, 0.3 ml min<sup>-1</sup>; temperature, 20 °C

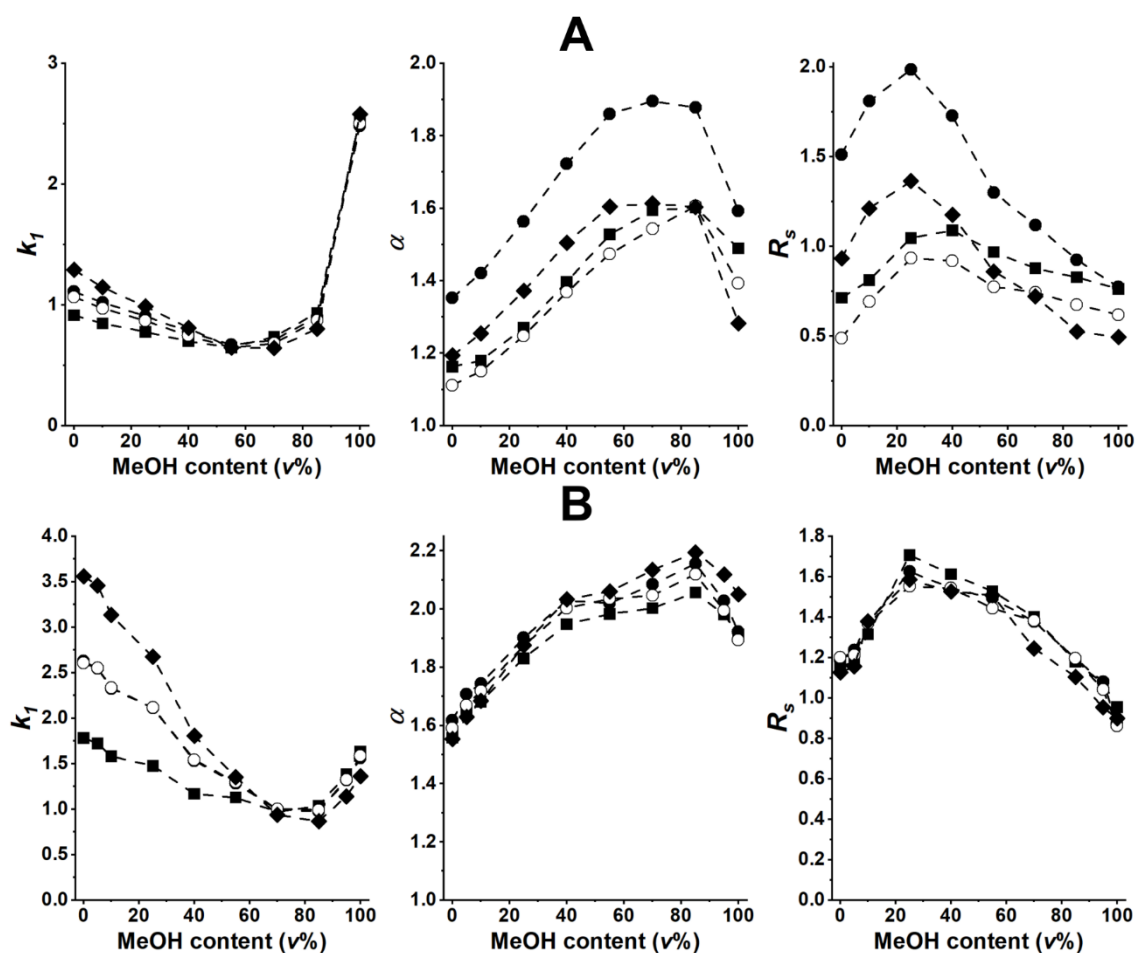

**Figure S2**

**Effects of mobile phase composition on the chromatographic parameters applying H<sub>2</sub>O/MeOH eluent systems with TEAA**

Chromatographic conditions: **A**, TeicoShell, **B**, TagShell; mobile phase H<sub>2</sub>O/MeOH = 100/0 – 0/100 (v/v) containing 0.1 v% TEAA; detection, 215 nm; flow rate, 0.3 ml min<sup>-1</sup>; temperature, 20 °C; symbols for analytes, Trp, ■; 5-FTrp, ●; 6-FTrp, ○; 5,6-diFTrp, ◆

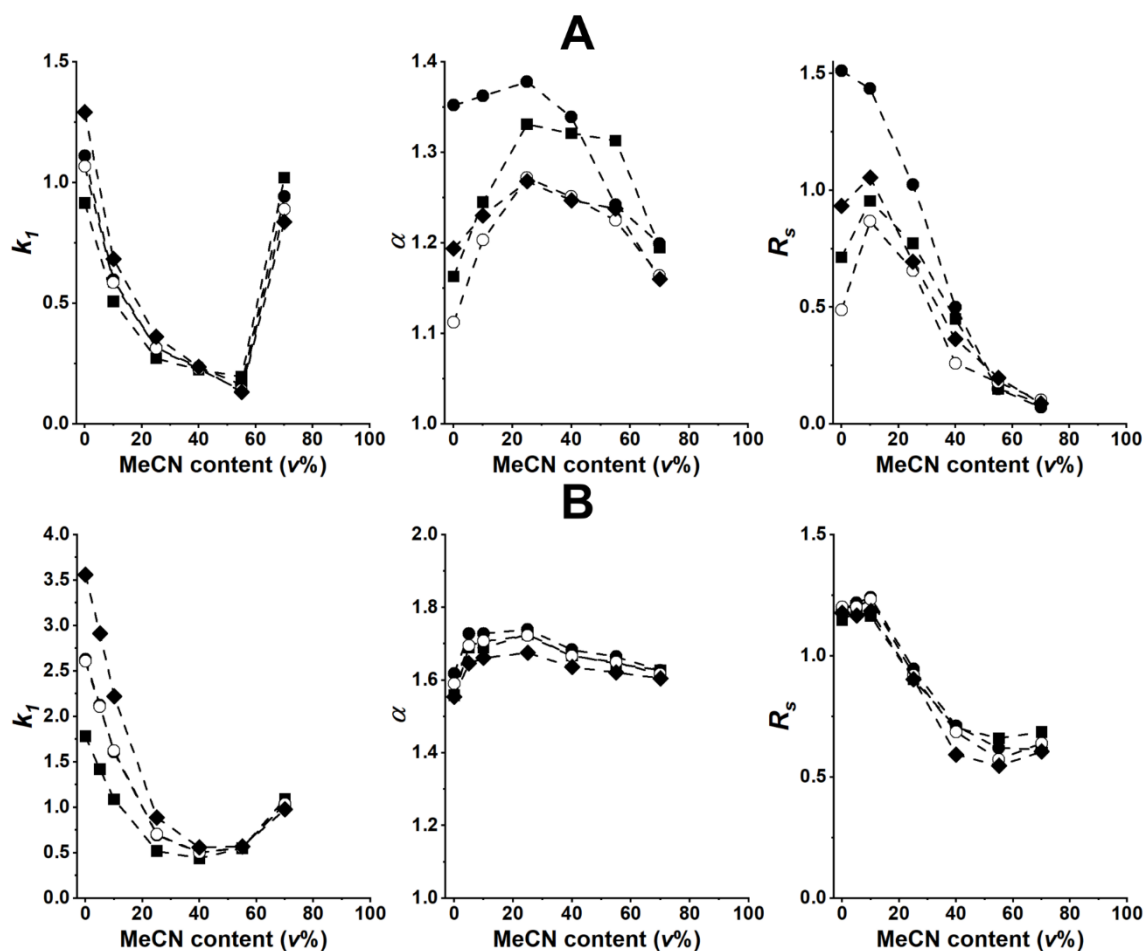

**Figure S3**  
**Effects of mobile phase composition on the chromatographic parameters applying**  
**H<sub>2</sub>O/MeCN eluent systems with TEAA**

Chromatographic conditions: **A**, TeicoShell, **B**, TagShell; mobile phase H<sub>2</sub>O/MeCN = 100/0 – 30/70 (v/v) containing 0.1 v% TEAA; detection, 215 nm; flow rate, 0.3 ml min<sup>-1</sup>; temperature, 20 °C; symbols for analytes, Trp, ■; 5-FTrp, ●; 6-FTrp, ○; 5,6-diFTrp, ◆

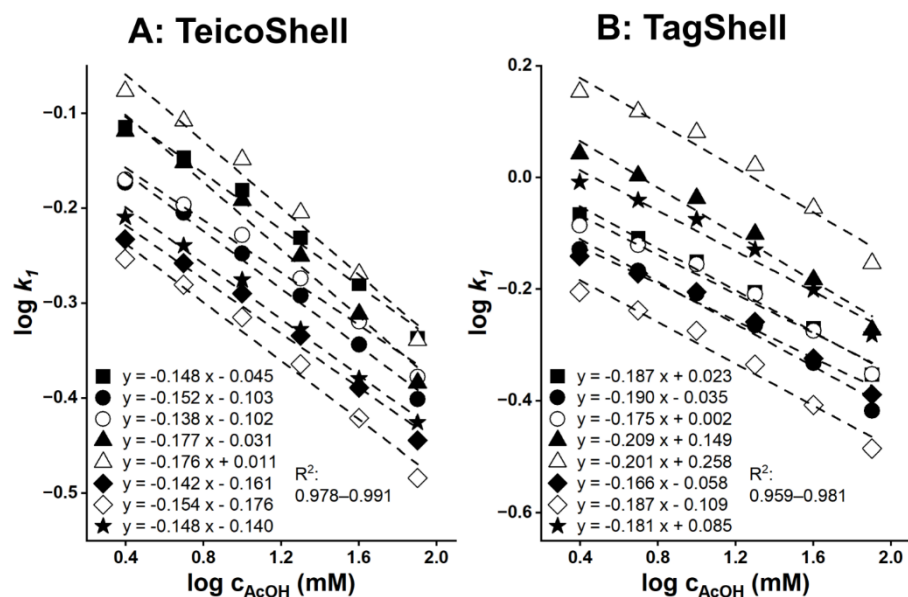

**Figure S4**

**Effects of AcOH concentration on the retention factor of the first eluting enantiomer ( $k_1$ )**  
 Chromatographic conditions: column, **A**, TeicoShell, **B**, TagShell; mobile phase H<sub>2</sub>O/MeOH = 30/70 (v/v) containing 2.5, 5, 10, 20, 40 and 80 mM AcOH; detection, 215 nm; flow rate, 0.3 ml min<sup>-1</sup>; temperature, 20 °C; symbols for analytes, Trp, ■; 5-FTrp, ●; 6-FTrp, ○; 4,5-diFTrp, ▲; 4,6-diFTrp, △; 5,6-diFTrp, ◆; 5,7-diFTrp, ◇; 4,5,6,7-tetraFTrp, ★

**Table S1**

*pK* values of the studied analytes

| <b>Sample</b>        | <b><i>pK</i> of the carboxyl group</b> | <b><i>pK</i> of the amino group</b> |
|----------------------|----------------------------------------|-------------------------------------|
| 1. Trp               | 2.51                                   | 9.54                                |
| 2. 5-FTrp            | 2.70                                   | 9.55                                |
| 3. 6-FTrp            | 2.70                                   | 9.54                                |
| 4. 4,5-diFTrp        | 3.10                                   | 9.52                                |
| 5. 4,6-diFTrp        | 3.11                                   | 9.51                                |
| 6. 5,6-diFTrp        | 3.05                                   | 9.56                                |
| 7. 5,7-diFTrp        | 3.13                                   | 9.56                                |
| 8. 4,5,6,7-tetraFTrp | 4.21                                   | 9.54                                |

The *pK* values of the studied analytes were calculated with Marvin Sketch v. 17.29 software, ChemAxon, Budapest

**Table S2**

Temperature dependence of the retention factor of the first eluting enantiomer ( $k_1$ ), separation factor ( $\alpha$ ), and resolution ( $R_S$ ) on TeicoShell (**T-3.0**) and TagShell (**Tag-3.0**) CSPs for analytes **1-8** in H<sub>2</sub>O/MeOH = 30/70 (v/v) mobile phase in the presence of AcOH as a mobile phase additive

| Analyte | $k_I$             | Temperature (C°) |      |      |      |      |      |
|---------|-------------------|------------------|------|------|------|------|------|
|         | $\alpha$<br>$R_S$ | 5                | 10   | 20   | 30   | 40   | 50   |
| T-3.0   |                   |                  |      |      |      |      |      |
| 1       | $k_I$             | 0.61             | 0.59 | 0.54 | 0.49 | 0.45 | 0.41 |
|         | $\alpha$          | 1.56             | 1.53 | 1.45 | 1.41 | 1.36 | 1.31 |
|         | $R_S$             | 3.26             | 2.71 | 2.66 | 2.60 | 2.34 | 2.05 |
| 2       | $k_I$             | 0.52             | 0.50 | 0.46 | 0.43 | 0.39 | 0.36 |
|         | $\alpha$          | 1.79             | 1.77 | 1.68 | 1.61 | 1.55 | 1.48 |
|         | $R_S$             | 3.87             | 3.77 | 3.42 | 3.46 | 3.16 | 2.76 |
| 3       | $k_I$             | 0.54             | 0.52 | 0.47 | 0.43 | 0.39 | 0.36 |
|         | $\alpha$          | 1.55             | 1.50 | 1.44 | 1.40 | 1.35 | 1.32 |
|         | $R_S$             | 2.95             | 2.63 | 2.63 | 2.49 | 2.19 | 1.87 |
| 4       | $k_I$             | 0.60             | 0.57 | 0.52 | 0.47 | 0.43 | 0.39 |
|         | $\alpha$          | 1.56             | 1.50 | 1.43 | 1.39 | 1.35 | 1.31 |
|         | $R_S$             | 2.82             | 2.36 | 2.41 | 2.42 | 2.16 | 1.86 |
| 5       | $k_I$             | 0.67             | 0.64 | 0.57 | 0.51 | 0.46 | 0.41 |
|         | $\alpha$          | 1.26             | 1.23 | 1.21 | 1.19 | 1.18 | 1.15 |
|         | $R_S$             | 1.27             | 1.24 | 1.22 | 1.12 | 0.87 | 0.56 |
| 6       | $k_I$             | 0.46             | 0.44 | 0.41 | 0.37 | 0.34 | 0.31 |
|         | $\alpha$          | 1.64             | 1.60 | 1.55 | 1.50 | 1.45 | 1.40 |
|         | $R_S$             | 2.85             | 2.88 | 2.85 | 2.55 | 2.30 | 1.97 |
| 7       | $k_I$             | 0.43             | 0.41 | 0.38 | 0.35 | 0.32 | 0.29 |
|         | $\alpha$          | 1.83             | 1.78 | 1.70 | 1.62 | 1.55 | 1.47 |
|         | $R_S$             | 3.12             | 3.08 | 3.17 | 2.91 | 2.56 | 2.19 |
| 8       | $k_I$             | 0.49             | 0.47 | 0.42 | 0.37 | 0.33 | 0.30 |
|         | $\alpha$          | 1.39             | 1.37 | 1.34 | 1.30 | 1.26 | 1.23 |
|         | $R_S$             | 1.82             | 1.81 | 1.66 | 1.50 | 1.27 | 1.03 |
| Tag-3.0 |                   |                  |      |      |      |      |      |
| 1       | $k_I$             | 0.77             | 0.71 | 0.63 | 0.55 | 0.48 | 0.42 |
|         | $\alpha$          | 2.24             | 2.19 | 2.12 | 2.05 | 1.97 | 1.59 |
|         | $R_S$             | 2.40             | 2.62 | 2.81 | 2.96 | 3.27 | 3.34 |
| 2       | $k_I$             | 0.66             | 0.62 | 0.55 | 0.49 | 0.42 | 0.37 |
|         | $\alpha$          | 2.70             | 2.63 | 2.55 | 2.48 | 2.35 | 2.23 |
|         | $R_S$             | 2.93             | 3.09 | 3.35 | 3.66 | 3.89 | 3.97 |
| 3       | $k_I$             | 0.76             | 0.70 | 0.62 | 0.54 | 0.47 | 0.41 |
|         | $\alpha$          | 2.36             | 2.31 | 2.23 | 2.17 | 2.07 | 1.97 |
|         | $R_S$             | 2.45             | 2.67 | 2.85 | 3.09 | 3.29 | 3.36 |
| 4       | $k_I$             | 1.02             | 0.93 | 0.80 | 0.70 | 0.59 | 0.50 |
|         | $\alpha$          | 2.00             | 1.99 | 1.99 | 1.98 | 1.93 | 1.90 |
|         | $R_S$             | 2.24             | 2.28 | 2.74 | 3.19 | 3.41 | 3.72 |

**Table S2 (continued)**

Temperature dependence of the retention factor of the first eluting enantiomer ( $k_1$ ), separation factor ( $\alpha$ ), and resolution ( $R_S$ ) on TeicoShell (**T-3.0**) and TagShell (**Tag-3.0**) CSPs for analytes **1-8** in H<sub>2</sub>O/MeOH = 30/70 (v/v) mobile phase in the presence of AcOH as a mobile phase additive

| Analyte  | $k_1$<br>$\alpha$<br>$R_S$ | Temperature (C°) |      |      |      |      |      |
|----------|----------------------------|------------------|------|------|------|------|------|
|          |                            | 5                | 10   | 20   | 30   | 40   | 50   |
| <b>5</b> | $k_1$                      | 1.38             | 1.24 | 1.04 | 0.87 | 0.72 | 0.59 |
|          | $\alpha$                   | 1.32             | 1.33 | 1.35 | 1.37 | 1.38 | 1.39 |
|          | $R_S$                      | 0.67             | 0.88 | 1.01 | 1.20 | 1.62 | 1.79 |
| <b>6</b> | $k_1$                      | 0.67             | 0.63 | 0.55 | 0.49 | 0.42 | 0.37 |
|          | $\alpha$                   | 2.52             | 2.46 | 2.38 | 2.31 | 2.21 | 2.09 |
|          | $R_S$                      | 2.57             | 2.63 | 2.88 | 3.12 | 3.48 | 3.46 |
| <b>7</b> | $k_1$                      | 0.56             | 0.53 | 0.47 | 0.41 | 0.36 | 0.32 |
|          | $\alpha$                   | 2.79             | 2.72 | 2.61 | 2.53 | 2.39 | 2.25 |
|          | $R_S$                      | 2.64             | 2.80 | 3.10 | 3.10 | 3.48 | 3.41 |
| <b>8</b> | $k_1$                      | 0.97             | 0.90 | 0.75 | 0.65 | 0.55 | 0.47 |
|          | $\alpha$                   | 1.79             | 1.75 | 1.75 | 1.71 | 1.65 | 1.60 |
|          | $R_S$                      | 1.52             | 1.56 | 1.87 | 1.99 | 2.20 | 2.18 |

Chromatographic conditions: columns, TeicoShell (**T-3.0**) and TagShell (**TAG-3.0**); mobile phase, H<sub>2</sub>O/MeOH = 30/70 (v/v) containing 0.1 v% AcOH; detection, 215 nm; flow rate, 0.3 ml min<sup>-1</sup>; temperature range, 5–50 °C



**Table S3**

Temperature dependence of the retention factor of the first eluting enantiomer ( $k_1$ ), separation factor ( $\alpha$ ), and resolution ( $R_S$ ) on TeicoShell (**T-3.0**) and TagShell (**Tag-3.0**) CSPs for analytes **1-8** in H<sub>2</sub>O/MeCN = 45/55 (v/v) mobile phase in the presence of AcOH as a mobile phase additive

| Analyte | $k_I$             | Temperature (C°) |      |      |      |      |      |
|---------|-------------------|------------------|------|------|------|------|------|
|         | $\alpha$<br>$R_S$ | 5                | 10   | 20   | 30   | 40   | 50   |
| T-3.0   |                   |                  |      |      |      |      |      |
| 1       | $k_I$             | 0.57             | 0.55 | 0.53 | 0.51 | 0.49 | 0.47 |
|         | $\alpha$          | 1.19             | 1.16 | 1.14 | 1.12 | 1.11 | 1.09 |
|         | $R_S$             | 1.55             | 1.17 | 0.89 | 0.62 | 0.48 | 0.35 |
| 2       | $k_I$             | 0.50             | 0.49 | 0.47 | 0.45 | 0.43 | 0.41 |
|         | $\alpha$          | 1.21             | 1.18 | 1.16 | 1.14 | 1.12 | 1.11 |
|         | $R_S$             | 1.55             | 1.29 | 1.02 | 0.90 | 0.78 | 0.66 |
| 3       | $k_I$             | 0.49             | 0.48 | 0.46 | 0.44 | 0.42 | 0.41 |
|         | $\alpha$          | 1.18             | 1.16 | 1.13 | 1.12 | 1.10 | 1.07 |
|         | $R_S$             | 1.37             | 1.09 | 0.80 | 0.64 | 0.51 | 0.39 |
| 4       | $k_I$             | 0.55             | 0.55 | 0.52 | 0.50 | 0.49 | 0.45 |
|         | $\alpha$          | 1.17             | 1.15 | 1.13 | 1.11 | 1.09 | 1.07 |
|         | $R_S$             | 1.45             | 1.12 | 0.85 | 0.67 | 0.52 | 0.40 |
| 5       | $k_I$             | 0.54             | 0.53 | 0.51 | 0.49 | 0.46 | 0.44 |
|         | $\alpha$          | 1.12             | 1.12 | 1.09 | 1.08 | 1.06 | 1.05 |
|         | $R_S$             | 1.07             | 0.80 | 0.54 | 0.40 | 0.29 | 0.15 |
| 6       | $k_I$             | 0.45             | 0.44 | 0.42 | 0.40 | 0.38 | 0.37 |
|         | $\alpha$          | 1.19             | 1.17 | 1.14 | 1.12 | 1.10 | 1.07 |
|         | $R_S$             | 1.11             | 0.87 | 0.59 | 0.50 | 0.35 | 0.22 |
| 7       | $k_I$             | 0.43             | 0.43 | 0.41 | 0.39 | 0.37 | 0.36 |
|         | $\alpha$          | 1.23             | 1.21 | 1.18 | 1.15 | 1.12 | 1.10 |
|         | $R_S$             | 1.45             | 1.16 | 0.92 | 0.78 | 0.66 | 0.57 |
| 8       | $k_I$             | 0.43             | 0.43 | 0.41 | 0.39 | 0.37 | 0.36 |
|         | $\alpha$          | 1.16             | 1.14 | 1.12 | 1.09 | 1.06 | 1.04 |
|         | $R_S$             | 1.12             | 0.84 | 0.64 | 0.52 | 0.40 | 0.31 |
| Tag-3.0 |                   |                  |      |      |      |      |      |
| 1       | $k_I$             | 0.27             | 0.27 | 0.26 | 0.26 | 0.26 | 0.25 |
|         | $\alpha$          | 2.22             | 2.09 | 1.98 | 1.87 | 1.75 | 1.64 |
|         | $R_S$             | 1.76             | 1.80 | 1.78 | 1.76 | 1.60 | 1.40 |
| 2       | $k_I$             | 0.24             | 0.24 | 0.23 | 0.22 | 0.22 | 0.22 |
|         | $\alpha$          | 2.52             | 2.36 | 2.24 | 2.11 | 1.95 | 1.82 |
|         | $R_S$             | 2.00             | 1.98 | 1.98 | 1.92 | 1.76 | 1.55 |
| 3       | $k_I$             | 0.27             | 0.26 | 0.25 | 0.24 | 0.24 | 0.24 |
|         | $\alpha$          | 2.29             | 2.17 | 2.06 | 1.95 | 1.82 | 1.70 |
|         | $R_S$             | 1.88             | 1.83 | 1.84 | 1.77 | 1.63 | 1.44 |
| 4       | $k_I$             | 0.31             | 0.31 | 0.30 | 0.29 | 0.28 | 0.28 |
|         | $\alpha$          | 2.13             | 2.04 | 1.96 | 1.86 | 1.75 | 1.58 |
|         | $R_S$             | 1.73             | 1.82 | 1.83 | 1.80 | 1.66 | 1.48 |

**Table S3 (continued)**

Temperature dependence of the retention factor of the first eluting enantiomer ( $k_1$ ), separation factor ( $\alpha$ ), and resolution ( $R_S$ ) on TeicoShell (**T-3.0**) and TagShell (**Tag-3.0**) CSPs for analytes **1-8** in H<sub>2</sub>O/MeCN = 45/55 (v/v) mobile phase in the presence of AcOH as a mobile phase additive

| Analyte  | $k_1$<br>$\alpha$<br>$R_S$ | Temperature (C°) |      |      |      |      |      |
|----------|----------------------------|------------------|------|------|------|------|------|
|          |                            | 5                | 10   | 20   | 30   | 40   | 50   |
| <b>5</b> | $k_1$                      | 0.36             | 0.36 | 0.34 | 0.32 | 0.30 | 0.29 |
|          | $\alpha$                   | 1.69             | 1.64 | 1.60 | 1.53 | 1.45 | 1.41 |
|          | $R_S$                      | 1.18             | 1.19 | 1.20 | 1.18 | 1.06 | 0.93 |
| <b>6</b> | $k_1$                      | 0.26             | 0.26 | 0.24 | 0.23 | 0.23 | 0.23 |
|          | $\alpha$                   | 2.24             | 2.15 | 2.06 | 1.95 | 1.82 | 1.71 |
|          | $R_S$                      | 1.73             | 1.76 | 1.80 | 1.77 | 1.60 | 1.41 |
| <b>7</b> | $k_1$                      | 0.22             | 0.22 | 0.21 | 0.21 | 0.21 | 0.20 |
|          | $\alpha$                   | 2.51             | 2.40 | 2.26 | 2.11 | 1.93 | 1.80 |
|          | $R_S$                      | 1.80             | 1.77 | 1.81 | 1.76 | 1.50 | 1.34 |
| <b>8</b> | $k_1$                      | 0.29             | 0.29 | 0.28 | 0.26 | 0.26 | 0.25 |
|          | $\alpha$                   | 2.02             | 1.95 | 1.85 | 1.76 | 1.65 | 1.56 |
|          | $R_S$                      | 1.45             | 1.38 | 1.37 | 1.34 | 1.27 | 1.11 |

Chromatographic conditions: column, TeicoShell (**T-3.0**) and TagShell (**TAG-3.0**); mobile phase, H<sub>2</sub>O/MeCN = 45/55 (v/v) containing 0.1 v% AcOH; detection, 215 nm; flow rate, 0.3 ml min<sup>-1</sup>; temperature range, 5–50 °C
